# Supplementary material for: The integrated analysis of metabolic and protein interaction networks reveals novel molecular organizing principles
Source: Springer Nature journal article supplement (doi:10.1186/1752-0509-2-100), 2008-11-25
Supplement: Additional file 4 [file 1752-0509-2-100-s4.pdf]

## GO Annotations used for identifying Protein Degradation/ Ubiquitin associated proteins

GO:0000151 ubiquitin ligase complex  
GO:0001509 legumain activity  
GO:0004175 endopeptidase activity  
GO:0004176 ATP-dependent peptidase activity  
GO:0004177 aminopeptidase activity  
GO:0004178 leucyl aminopeptidase activity  
GO:0004179 membrane alanyl aminopeptidase activity  
GO:0004180 carboxypeptidase activity  
GO:0004182 carboxypeptidase A activity  
GO:0004185 serine carboxypeptidase activity  
GO:0004186 carboxypeptidase C activity  
GO:0004187 carboxypeptidase D activity  
GO:0004190 aspartic-type endopeptidase activity  
GO:0004191 barrierpepsin activity  
GO:0004194 pepsin A activity  
GO:0004196 saccharopepsin activity  
GO:0004197 cysteine-type endopeptidase activity  
GO:0004198 calpain activity  
GO:0004221 ubiquitin thiolesterase activity  
GO:0004222 metalloendopeptidase activity  
GO:0004226 Gly-X carboxypeptidase activity  
GO:0004239 methionyl aminopeptidase activity  
GO:0004240 mitochondrial processing peptidase activity  
GO:0004243 mitochondrial intermediate peptidase activity  
GO:0004244 mitochondrial inner membrane peptidase activity  
GO:0004247 saccharolysin activity  
GO:0004250 aminopeptidase I activity  
GO:0004252 serine-type endopeptidase activity  
GO:0004262 cerevisin activity  
GO:0004274 dipeptidyl-peptidase IV activity  
GO:0004287 prolyl oligopeptidase activity  
GO:0004289 subtilase activity  
GO:0004298 threonine endopeptidase activity  
GO:0004839 ubiquitin activating enzyme activity  
GO:0004839 ubiquitin activating enzyme activity  
GO:0004842 ubiquitin conjugating enzyme activity  
GO:0004843 ubiquitin-specific protease activity  
GO:0004866 endopeptidase inhibitor activity  
GO:0004867 serine-type endopeptidase inhibitor activity  
GO:0005680 anaphase-promoting complex  
GO:0006511 ubiquitin-dependent protein catabolic process  
GO:0006512 ubiquitin cycle  
GO:0008054 cyclin catabolic process  
GO:0008233 peptidase activity  
GO:0008234 cysteine-type peptidase activity  
GO:0008235 metalloexopeptidase activity  
GO:0008236 serine-type peptidase activity  
GO:0008237 metallopeptidase activity  
GO:0008423 bleomycin hydrolase activity  
GO:0008450 O-sialoglycoprotein endopeptidase activity  
GO:0008451 X-Pro aminopeptidase activity  
GO:0008487 prenyl-dependent CAAX protease activity  
GO:0008641 small protein activating enzyme activity  
GO:0008717 D-alanyl-D-alanine endopeptidase activity

GO:0008769 X-His dipeptidase activity  
GO:0009003 signal peptidase activity  
GO:0009049 aspartic-type signal peptidase activity  
GO:0016574 histone ubiquitination  
GO:0016806 dipeptidyl-peptidase and tripeptidyl-peptidase activity  
GO:0016929 SUMO-specific protease activity  
GO:0017039 dipeptidyl-peptidase III activity  
GO:0019005 SCF ubiquitin ligase complex  
GO:0019778 APG12 activating enzyme activity  
GO:0019779 APG8 activating enzyme activity  
GO:0019781 NEDD8 activating enzyme activity  
GO:0019787 small conjugating protein ligase activity  
GO:0019789 SUMO ligase activity  
GO:0019948 SUMO activating enzyme activity  
GO:0030414 protease inhibitor activity  
GO:0030433 ER-associated protein catabolic process  
GO:0030693 caspase activity  
GO:0031145 anaphase-promoting complex-dependent proteasomal ubiquitin-dependent protein catabolic process  
GO:0031146 SCF-dependent proteasomal ubiquitin-dependent protein catabolic process  
GO:0031371 ubiquitin conjugating enzyme complex  
GO:0031386 protein tag  
GO:0031463 Cul3-RING ubiquitin ligase complex  
GO:0032435 negative regulation of proteasomal ubiquitin-dependent protein catabolic process  
GO:0042292 URM1 activating enzyme activity  
GO:0042576 aspartyl aminopeptidase activity  
GO:0042787 protein ubiquitination during ubiquitin-dependent protein catabolic process  
GO:0043130 ubiquitin binding  
GO:0043161 proteasomal ubiquitin-dependent protein catabolic process  
GO:0043162 ubiquitin-dependent protein catabolic process via the multivesicular body pathway  
GO:0043224 nuclear SCF ubiquitin ligase complex  
GO:0043328 protein targeting to vacuole during ubiquitin-dependent protein catabolic process via the MVB pathway  
GO:0051436 negative regulation of ubiquitin ligase activity during mitotic cell cycle  
GO:0051443 positive regulation of ubiquitin ligase activity

## GO Annotations used for identifying Kinase/Phosphatase proteins

GO:0000155 two-component sensor activity  
GO:0000156 two-component response regulator activity  
GO:0000158 protein phosphatase type 2A activity  
GO:0000159 protein phosphatase type 2A complex  
GO:0000163 protein phosphatase type 1 activity  
GO:0000164 protein phosphatase type 1 complex  
GO:0003924 GTPase activity  
GO:0004672 protein kinase activity  
GO:0004673 protein histidine kinase activity  
GO:0004674 protein serine/threonine kinase activity  
GO:0004679 AMP-activated protein kinase activity  
GO:0004680 casein kinase activity  
GO:0004681 casein kinase I activity  
GO:0004682 protein kinase CK2 activity  
GO:0004683 calmodulin regulated protein kinase activity  
GO:0004684 calmodulin-dependent protein kinase I activity  
GO:0004685 calcium- and calmodulin-dependent protein kinase activity  
GO:0004691 cAMP-dependent protein kinase activity  
GO:0004693 cyclin-dependent protein kinase activity  
GO:0004694 eukaryotic translation initiation factor 2alpha kinase activity  
GO:0004696 glycogen synthase kinase 3 activity  
GO:0004697 protein kinase C activity  
GO:0004702 receptor signaling protein serine/threonine kinase activity  
GO:0004707 MAP kinase activity  
GO:0004708 MAP kinase kinase activity  
GO:0004709 MAP kinase kinase kinase activity  
GO:0004712 protein threonine/tyrosine kinase activity  
GO:0004713 protein-tyrosine kinase activity  
GO:0004721 phosphoprotein phosphatase activity  
GO:0004722 protein serine/threonine phosphatase activity  
GO:0004723 calcium-dependent protein serine/threonine phosphatase activity  
GO:0004725 protein tyrosine phosphatase activity  
GO:0004727 prenylated protein tyrosine phosphatase activity  
GO:0004860 protein kinase inhibitor activity  
GO:0004861 cyclin-dependent protein kinase inhibitor activity  
GO:0004862 cAMP-dependent protein kinase inhibitor activity  
GO:0004864 protein phosphatase inhibitor activity  
GO:0004871 signal transducer activity  
GO:0004872 receptor activity  
GO:0004888 transmembrane receptor activity  
GO:0004930 G-protein coupled receptor activity  
GO:0004932 mating-type factor pheromone receptor activity  
GO:0004933 mating-type a-factor pheromone receptor activity  
GO:0004934 mating-type alpha-factor pheromone receptor activity  
GO:0005034 osmosensor activity  
GO:0005057 receptor signaling protein activity  
GO:0005083 small GTPase regulator activity  
GO:0005955 calcineurin complex  
GO:0008138 protein tyrosine/serine/threonine phosphatase activity  
GO:0008158 hedgehog receptor activity  
GO:0008287 protein serine/threonine phosphatase complex

GO:0008330 protein tyrosine/threonine phosphatase activity  
GO:0008349 MAP kinase kinase kinase activity  
calcium-dependent protein serine/threonine phosphatase regulator activity  
GO:0008597 activity  
GO:0008599 protein phosphatase type 1 regulator activity  
GO:0008601 protein phosphatase type 2A regulator activity  
GO:0008603 cAMP-dependent protein kinase regulator activity  
GO:0008605 protein kinase CK2 regulator activity  
GO:0015071 protein phosphatase type 2C activity  
GO:0016299 regulator of G-protein signaling activity  
GO:0016301 kinase activity  
GO:0016538 cyclin-dependent protein kinase regulator activity  
GO:0017017 MAP kinase phosphatase activity  
GO:0019207 kinase regulator activity  
GO:0019209 kinase activator activity  
GO:0019211 phosphatase activator activity  
GO:0019828 aspartic-type endopeptidase inhibitor activity  
GO:0019887 protein kinase regulator activity  
GO:0019888 protein phosphatase regulator activity  
GO:0019912 cyclin-dependent protein kinase activating kinase activity  
GO:0030295 protein kinase activator activity  
GO:0030695 GTPase regulator activity  
GO:0033550 MAP kinase tyrosine phosphatase activity  
GO:0035174 histone serine kinase activity  
GO:0043539 protein serine/threonine kinase activator activity

## GO Annotations used for identifying DNA-related proteins

GO:0000014 single-stranded DNA specific endodeoxyribonuclease activity  
GO:0000049 tRNA binding  
GO:0000124 SAGA complex  
GO:0000149 SNARE binding  
GO:0000175 3'-5'-exoribonuclease activity  
GO:0000179 rRNA (adenine-N6,N6-)-dimethyltransferase activity  
GO:0000182 rDNA binding  
GO:0000213 tRNA-intron endonuclease activity  
GO:0000215 tRNA 2'-phosphotransferase activity  
GO:0000339 RNA cap binding  
GO:0000400 four-way junction DNA binding  
GO:0000403 Y-form DNA binding  
GO:0003677 DNA binding  
GO:0003678 DNA helicase activity  
GO:0003680 AT DNA binding  
GO:0003682 chromatin binding  
GO:0003684 damaged DNA binding  
GO:0003688 DNA replication origin binding  
GO:0003689 DNA clamp loader activity  
GO:0003690 double-stranded DNA binding  
GO:0003697 single-stranded DNA binding  
GO:0003700 transcription factor activity  
GO:0003701 RNA polymerase I transcription factor activity  
GO:0003702 RNA polymerase II transcription factor activity  
GO:0003704 specific RNA polymerase II transcription factor activity  
GO:0003706 ligand-regulated transcription factor activity  
GO:0003709 RNA polymerase III transcription factor activity  
GO:0003711 transcriptional elongation regulator activity  
GO:0003712 transcription cofactor activity  
GO:0003713 transcription coactivator activity  
GO:0003714 transcription corepressor activity  
GO:0003723 RNA binding  
GO:0003724 RNA helicase activity  
GO:0003729 mRNA binding  
GO:0003735 structural constituent of ribosome  
GO:0003743 translation initiation factor activity  
GO:0003746 translation elongation factor activity  
GO:0003747 translation release factor activity  
GO:0003887 DNA-directed DNA polymerase activity  
GO:0003889 alpha DNA polymerase activity  
GO:0003890 beta DNA polymerase activity  
GO:0003891 delta DNA polymerase activity  
GO:0003893 epsilon DNA polymerase activity  
GO:0003894 zeta DNA polymerase activity  
GO:0003895 gamma DNA-directed DNA polymerase activity  
GO:0003896 DNA primase activity  
GO:0003899 DNA-directed RNA polymerase activity  
GO:0003905 alkylbase DNA N-glycosylase activity  
GO:0003906 DNA-(apurinic or apyrimidinic site) lyase activity  
GO:0003908 methylated-DNA-[protein]-cysteine S-methyltransferase activity  
GO:0003910 DNA ligase (ATP) activity  
GO:0003917 DNA topoisomerase type I activity

GO:0003918 DNA topoisomerase (ATP-hydrolyzing) activity  
GO:0004003 ATP-dependent DNA helicase activity  
GO:0004004 ATP-dependent RNA helicase activity  
GO:0004045 aminoacyl-tRNA hydrolase activity  
GO:0004402 histone acetyltransferase activity  
GO:0004406 H3/H4 histone acetyltransferase activity  
GO:0004407 histone deacetylase activity  
GO:0004479 methionyl-tRNA formyltransferase activity  
GO:0004482 mRNA (guanine-N7-)-methyltransferase activity  
GO:0004484 mRNA guanylyltransferase activity  
GO:0004808 tRNA (5-methylaminomethyl-2-thiouridylate)-methyltransferase activity  
GO:0004809 tRNA (guanine-N2-)-methyltransferase activity  
GO:0004810 tRNA adenylyltransferase activity  
GO:0004811 tRNA isopentenyltransferase activity  
GO:0004813 alanine-tRNA ligase activity  
GO:0004814 arginine-tRNA ligase activity  
GO:0004815 aspartate-tRNA ligase activity  
GO:0004816 asparagine-tRNA ligase activity  
GO:0004817 cysteine-tRNA ligase activity  
GO:0004818 glutamate-tRNA ligase activity  
GO:0004819 glutamine-tRNA ligase activity  
GO:0004820 glycine-tRNA ligase activity  
GO:0004821 histidine-tRNA ligase activity  
GO:0004822 isoleucine-tRNA ligase activity  
GO:0004823 leucine-tRNA ligase activity  
GO:0004824 lysine-tRNA ligase activity  
GO:0004825 methionine-tRNA ligase activity  
GO:0004826 phenylalanine-tRNA ligase activity  
GO:0004827 proline-tRNA ligase activity  
GO:0004828 serine-tRNA ligase activity  
GO:0004829 threonine-tRNA ligase activity  
GO:0004830 tryptophan-tRNA ligase activity  
GO:0004831 tyrosine-tRNA ligase activity  
GO:0004832 valine-tRNA ligase activity  
GO:0004844 uracil DNA N-glycosylase activity  
GO:0005671 Ada2/Gcn5/Ada3 transcription activator complex  
GO:0006608 snRNP protein import into nucleus  
GO:0006609 mRNA-binding (hnRNP) protein import into nucleus  
GO:0008079 translation termination factor activity  
GO:0008094 DNA-dependent ATPase activity  
GO:0008134 transcription factor binding  
GO:0008135 translation factor activity, nucleic acid binding  
GO:0008159 positive transcription elongation factor activity  
GO:0008173 RNA methyltransferase activity  
GO:0008174 mRNA methyltransferase activity  
GO:0008175 tRNA methyltransferase activity  
GO:0008193 tRNA guanylyltransferase activity  
GO:0008251 tRNA specific adenosine deaminase activity  
GO:0008301 DNA bending activity  
GO:0008419 RNA lariat debranching enzyme activity  
GO:0008534 oxidized purine base lesion DNA N-glycosylase activity  
GO:0008650 rRNA (uridine-2'-O-)-methyltransferase activity  
GO:0008989 rRNA (guanine-N1-)-methyltransferase activity  
GO:0010390 histone monoubiquitination  
GO:0015999 eta DNA polymerase activity  
GO:0016149 translation release factor activity, codon specific

GO:0016251 general RNA polymerase II transcription factor activity  
GO:0016423 tRNA (guanine) methyltransferase activity  
GO:0016424 tRNA (guanosine) methyltransferase activity  
GO:0016428 tRNA (cytosine-5-)-methyltransferase activity  
GO:0016429 tRNA (adenine-N1-)-methyltransferase activity  
GO:0016431 tRNA (uridine) methyltransferase activity  
GO:0016439 tRNA-pseudouridine synthase activity  
GO:0016455 RNA polymerase II transcription mediator activity  
GO:0016563 transcriptional activator activity  
GO:0016564 transcriptional repressor activity  
GO:0016565 general transcriptional repressor activity  
GO:0016566 specific transcriptional repressor activity  
GO:0016944 RNA polymerase II transcription elongation factor activity  
GO:0017005 tyrosyl-DNA phosphodiesterase activity  
GO:0017136 NAD-dependent histone deacetylase activity  
GO:0017150 tRNA dihydrouridine synthase activity  
GO:0019237 centromeric DNA binding  
GO:0019843 rRNA binding  
GO:0030188 chaperone regulator activity  
GO:0030337 DNA polymerase processivity factor activity  
GO:0030371 translation repressor activity  
GO:0030515 snoRNA binding  
GO:0030528 transcription regulator activity  
GO:0030620 U2 snRNA binding  
GO:0031202 RNA splicing factor activity, transesterification mechanism  
GO:0031490 chromatin DNA binding  
GO:0032041 NAD-dependent histone deacetylase activity (H3-K14 specific)  
GO:0032777 Piccolo NuA4 histone acetyltransferase complex  
GO:0033100 NuA3 histone acetyltransferase complex  
GO:0035267 NuA4 histone acetyltransferase complex  
GO:0042054 histone methyltransferase activity  
GO:0042134 rRNA primary transcript binding  
GO:0042162 telomeric DNA binding  
GO:0042393 histone binding  
GO:0042800 histone lysine N-methyltransferase activity (H3-K4 specific)  
GO:0043140 ATP-dependent 3' to 5' DNA helicase activity  
GO:0043141 ATP-dependent 5' to 3' DNA helicase activity  
GO:0043166 H4/H2A histone acetyltransferase activity  
GO:0043189 H4/H2A histone acetyltransferase complex  
GO:0045129 NAD-independent histone deacetylase activity  
GO:0045182 translation regulator activity  
GO:0046695 SLIK (SAGA-like) complex  
GO:0046969 NAD-dependent histone deacetylase activity (H3-K9 specific)  
GO:0046970 NAD-dependent histone deacetylase activity (H4-K16 specific)  
GO:0050072 m7G(5')pppN diphosphatase activity  
GO:0051500 D-tyrosyl-tRNA(Tyr) deacylase activity  
GO:0051864 histone demethylase activity (H3-K36 specific)

## GO Annotations used for identifying other, non-metabolic proteins

GO:0000054 ribosome export from nucleus  
GO:0000055 ribosomal large subunit export from nucleus  
GO:0000056 ribosomal small subunit export from nucleus  
GO:0000059 protein import into nucleus, docking  
GO:0000060 protein import into nucleus, translocation  
GO:0000149 SNARE binding  
GO:0000208 nuclear translocation of MAPK during osmolarity sensing  
GO:0000268 peroxisome targeting sequence binding  
GO:0000290 deadenylation-dependent decapping  
GO:0001671 ATPase stimulator activity  
GO:0003923 GPI-anchor transamidase activity  
GO:0003924 GTPase activity  
GO:0004175 endopeptidase activity  
GO:0004596 peptide alpha-N-acetyltransferase activity  
GO:0004857 enzyme inhibitor activity  
GO:0004860 protein kinase inhibitor activity  
GO:0004871 signal transducer activity  
GO:0005084 Rab escort protein activity  
GO:0005085 guanyl-nucleotide exchange factor activity  
GO:0005086 ARF guanyl-nucleotide exchange factor activity  
GO:0005088 Ras guanyl-nucleotide exchange factor activity  
GO:0005089 Rho guanyl-nucleotide exchange factor activity  
GO:0005093 Rab GDP-dissociation inhibitor activity  
GO:0005094 Rho GDP-dissociation inhibitor activity  
GO:0005095 GTPase inhibitor activity  
GO:0005096 GTPase activator activity  
GO:0005097 Rab GTPase activator activity  
GO:0005098 Ran GTPase activator activity  
GO:0005099 Ras GTPase activator activity  
GO:0005100 Rho GTPase activator activity  
GO:0006605 protein targeting  
GO:0006606 protein import into nucleus  
GO:0006607 NLS-bearing substrate import into nucleus  
GO:0006610 ribosomal protein import into nucleus  
GO:0006611 protein export from nucleus  
GO:0006612 protein targeting to membrane  
GO:0006613 cotranslational protein targeting to membrane  
GO:0006614 SRP-dependent cotranslational protein targeting to membrane  
GO:0006616 SRP-dependent cotranslational protein targeting to membrane,  
GO:0006617 SRP-dependent cotranslational protein targeting to membrane, signal  
GO:0006617 cognition  
GO:0006620 posttranslational protein targeting to membrane  
GO:0006623 protein targeting to vacuole  
GO:0006625 protein targeting to peroxisome  
GO:0006626 protein targeting to mitochondrion  
GO:0006627 mitochondrial protein processing  
GO:0006886 intracellular protein transport  
GO:0007092 anaphase-promoting complex activation during mitotic cell cycle  
GO:0008047 enzyme activator activity  
GO:0008060 ARF GTPase activator activity  
GO:0008139 nuclear localization sequence binding

GO:0008308 voltage-gated ion-selective channel activity  
GO:0008320 protein carrier activity  
GO:0008538 proteasome activator activity  
GO:0008565 protein transporter activity  
GO:0015664 nicotinamide mononucleotide permease activity  
GO:0016538 cyclin-dependent protein kinase regulator activity  
GO:0016558 protein import into peroxisome matrix  
GO:0016560 protein import into peroxisome matrix, docking  
GO:0016562 protein import into peroxisome matrix, receptor recycling  
GO:0016598 protein arginylation  
GO:0016925 protein sumoylation  
GO:0017112 Rab guanyl-nucleotide exchange factor activity  
GO:0019211 phosphatase activator activity  
GO:0030150 protein import into mitochondrial matrix  
GO:0030189 chaperone activator activity  
GO:0030190 chaperone inhibitor activity  
GO:0030234 enzyme regulator activity  
GO:0030970 retrograde protein transport, ER to cytosol  
GO:0031204 posttranslational protein targeting to membrane, translocation  
GO:0031386 protein tag  
GO:0032258 CVT pathway  
GO:0032527 protein exit from endoplasmic reticulum  
GO:0042719 mitochondrial intermembrane space protein transporter complex  
GO:0042992 negative regulation of transcription factor import into nucleus  
GO:0042994 cytoplasmic sequestering of transcription factor  
GO:0043001 Golgi to plasma membrane protein transport  
protein targeting to vacuole during ubiquitin-dependent protein catabolic  
GO:0043328 he MVB pathway  
GO:0045039 protein import into mitochondrial inner membrane  
GO:0045040 protein import into mitochondrial outer membrane  
GO:0045041 protein import into mitochondrial intermembrane space  
GO:0045046 protein import into peroxisome membrane  
GO:0045047 protein targeting to ER  
GO:0048306 calcium-dependent protein binding  
GO:0051082 unfolded protein binding

## currency metabolites, co-factors removed from the metabolic network

|        |                                                                  |
|--------|------------------------------------------------------------------|
| C00001 | H <sub>2</sub> O                                                 |
| C00002 | ATP                                                              |
| C00003 | NAD <sup>+</sup>                                                 |
| C00004 | NADH                                                             |
| C00005 | NADPH                                                            |
| C00006 | NADP <sup>+</sup>                                                |
| C00007 | Oxygen;O <sub>2</sub>                                            |
| C00008 | ADP                                                              |
| C00009 | Orthophosphate;Pi                                                |
| C00010 | CoA                                                              |
| C00011 | CO <sub>2</sub>                                                  |
| C00013 | Pyrophosphate;PPi                                                |
| C00014 | NH <sub>3</sub>                                                  |
| C00015 | UDP                                                              |
| C00016 | FAD                                                              |
| C00018 | Pyridoxalphosphate                                               |
| C00019 | S-Adenosyl-L-methionine; SAM                                     |
| C00020 | AMP                                                              |
| C00021 | S-Adenosylhomocysteine; SAH                                      |
| C00023 | Iron                                                             |
| C00027 | H <sub>2</sub> O <sub>2</sub>                                    |
| C00028 | Acceptor                                                         |
| C00030 | Reduced acceptor                                                 |
| C00034 | Manganese                                                        |
| C00035 | GDP                                                              |
| C00038 | Zinc                                                             |
| C00044 | GTP                                                              |
| C00050 | Metal                                                            |
| C00055 | CMP                                                              |
| C00061 | FMN                                                              |
| C00063 | CTP                                                              |
| C00070 | Copper                                                           |
| C00075 | UTP                                                              |
| C00076 | Calcium;Ca <sup>2+</sup>                                         |
| C00080 | H <sup>+</sup>                                                   |
| C00105 | UMP                                                              |
| C00112 | CDP                                                              |
| C00113 | PQQ                                                              |
| C00115 | Chloride                                                         |
| C00120 | Biotin;D-Biotin;VitaminH;CoenzymeR                               |
| C00125 | Ferricytochromec;Cytochromec <sup>3+</sup>                       |
| C00126 | Ferrocyclochromec;Cytochromec <sup>2+</sup> ;Reducedcyclochromec |
| C00138 | Reducedferredoxin                                                |
| C00139 | Oxidizedferredoxin                                               |
| C00144 | GMP                                                              |
| C00175 | Cobalt;Co <sup>2+</sup>                                          |
| C00194 | Cobamidecoenzyme                                                 |
| C00205 | hn;Light                                                         |
| C00238 | Potassium;K <sup>+</sup>                                         |
| C00291 | Nickel;Ni <sup>2+</sup>                                          |
| C01352 | FADH <sub>2</sub>                                                |
